# Supplementary material
Source: publisher figshare collection journal article supplement (https://brill.figshare.com/ndownloader/files/27898995)
Supplement: Supplementary file 1 [file 27898995]

**Supplementary Table S3.** GC-MS conditions.

| GC-MS: TQ8040 with GC2010Plus (Shimadzu) |
| --- |
| Column: GL Science, IneretCap Pure-WAX (polyethylene glycol) fused capillary column, 60 m × 0.32 mm i.d. 0.5 μm film |
| Temperature programmed: 5 min at 45°C, 10°C min–1 to 240°C, 15 min |
| Injector: 240°C |
| Transfer line: 240°C |
| Ion source: 200°C |
| Injection method: split mode (3:1) |
| Carrier gas: He, 2 ml min–1, constant flow mode |
| Ionisation method: EI, SIM/Scan mode |
| Scan range: 33 amu to 300 amu |
| Ionisation method: CI (iso-butane), Scan mode |
| Scan range: 100 amu to 300 amu |
